# Supplementary material for: Biological Observation and Multi-omics Analysis Reveal the Toxicity of the Bioinsecticide Matrine to Honeybees (Apis cerana)
Source: Research Square preprint supplement (doi:10.21203/rs.3.rs-7062509/v1), 2025-07-08
Supplement: Supplementary file 1 [file a071882cae83806aff960c80.docx]

Table S1 Sequences of primer pairs used in the real-time quantitative PCR reactions.

| Gene | Primers | sequences（5'-3') | size(bp) |
| --- | --- | --- | --- |
| LOC108002960 | LOC108002960-F | AGGCTGTCCGTATCGTGA | 205 |
| LOC108002960-R | TTAGGCAATAAACTCGTGTCC | 205 |
| LOC108002963 | LOC108002963-F | CCCCAACCGAGATCCTAC | 162 |
| LOC108002963-R | TCCGTTCACATAAAAGCAGA | 162 |
| LOC108002965 | LOC108002965-F | AGCCACAAATTGTAAATCCTC | 183 |
| LOC108002965-R | GTTGAACCAAAACTTGTCCTT | 183 |
| LOC108002964 | LOC108002964-F | CAGCAAGTTGAAACAGGATACC | 192 |
| LOC108002964-R | AAAACGAGGGAGGCGAAT | 192 |
| LOC108003566 | LOC108003566-F | CAGGTCAAAGTTCACCGATTC | 198 |
| LOC108003566-R | CGTAAAGTGGGAGGAGATGC | 198 |
| LOC107993345 | LOC107993345-F | TTCCGCAAACACTATCGC | 111 |
| LOC107993345-R | GCTTCATTGAGGACACGCT | 111 |
| LOC108001650 | LOC108001650-F | GTGGCTCTAAAGGGGATGC | 199 |
| LOC108001650-R | CGAGGGAACAGGTGTAAGG | 199 |
| LOC107998471 | LOC107998471-F | CTACTAGACCAGAGCCAGAAAG | 237 |
| LOC107998471-R | CTCGTTGAGAAGCATCCATA | 237 |
| LOC108000407 | LOC108000407-F | GGGTATTTGGTTATGGTTCG | 194 |
| LOC108000407-R | AGCAACACCCCATACTTCAT | 194 |
| LOC107994703 | LOC107994703-F | GCGACAAAACAAGAATTAGAAG | 95 |
| LOC107994703-R | TCCACAAAAGCAAATCCAG | 95 |
| LOC107999176 | LOC107999176-F | TCATTATGATATTCGAGGCG | 80 |
| LOC107999176-R | CCATTACCGTTATTTGCTTG | 80 |
| LOC108001900 | LOC108001900-F | TCAAAGGAAAACCAGCCATA | 237 |
| LOC108001900-R | CCAGAGTTACTTGCGATACACC | 237 |
| β-actin | β-actin-F | TTGTATGCCAACACTGTCCTTT | 120 |
| β-actin-R | TGGCGCGATGATCTTAATTT | 120 |

Table S2 Pairs of metabolites and microbiota exhibited correlation across multiple treatment groups.

| Pairs of treatment group and control group | Metabolite | Microbiota |
| --- | --- | --- |
| T2_D22 vs.CK_D22, T3_D22 vs.CK_D22 | 2-[(3S)-1-(2-Chlorobenzyl)-3-pyrrolidinyl]-5-methyl-1,3,4-oxadiazole | *Dorea* |
| T2_D22 vs.CK_D22, T3_D22 vs.CK_D22 | gamma-Glutamylleucine | *Dorea* |
| T2_D22 vs.CK_D22, T3_D22 vs.CK_D22 | Argininosuccinic acid | *Dorea* |
| T2_D22 vs.CK_D22, T3_D22 vs.CK_D22 | Argininosuccinic acid | *Lachnoclostridium* |
| T2_D22 vs.CK_D22, T3_D22 vs.CK_D22 | 1,3-dimethyl-6-(trifluoromethyl)-1H-pyrazolo[3,4-b]pyridin-4-ol | *Lachnoclostridium* |
| T2_D22 vs.CK_D22, T3_D22 vs.CK_D22 | 2-[5-(2-hydroxypropyl)oxolan-2-yl]propanoic acid | *Lachnoclostridium* |
| T2_D22 vs.CK_D22, T3_D22 vs.CK_D22 | 5-(2,5-dihydroxyhexyl)oxolan-2-one | *Lachnoclostridium* |
| T2_D22 vs.CK_D22, T3_D22 vs.CK_D22 | 6-Pentyl-2H-pyran-2-one | *Lachnoclostridium* |
| T2_D22 vs.CK_D22, T3_D22 vs.CK_D22 | N-(2-morpholinophenyl)-2-furamide | *Lachnoclostridium* |
| T2_D22 vs.CK_D22, T3_D22 vs.CK_D22 | PC (18:1/20:5) | *Lachnoclostridium* |

Table S3 Pairs of metabolites and microbiota co-enriched in the same KEGG pathways across multiple treatment groups.

| Pairs of Treatment group and control group | | KEGG Pathways | metabolite | Transcription genes |
| --- | --- | --- | --- | --- |
| T1_D22.vs.CK_D22 | T3_D22.vs.CK_D22 | Arginine and proline metabolism | Spermidine | *LOC107998471* |
| T1_D22.vs.CK_D22 | T3_D22.vs.CK_D22 | beta-Alanine metabolism | Spermidine | *LOC107998471* |
| T2_D15.vs.CK_D15 | T3_D15.vs.CK_D15 | Cysteine and methionine metabolism | Homocysteine | *LOC108003269/LOC108001900* |
| T2_D15.vs.CK_D15 | T3_D15.vs.CK_D15 | Phototransduction - fly | Arachidonic acid | *LOC108004131*********/LOC107998381**********/LOC107995353/LOC108001544/LOC108003363********* |
| T1_D15.vs.CK_D15 | T3_D22.vs.CK_D22 | Purine metabolism | 2'-Deoxyguanosine | *LOC107996199/LOC108002375* |
| T1_D22.vs.CK_D22 | T3_D15.vs.CK_D15 | Starch and sucrose metabolism | Trehalose | *LOC107995328* |
| T1_D22.vs.CK_D22 | T2_D15.vs.CK_D15 | Valine, leucine and isoleucine degradation | 3-Methyl-2-oxobutanoic acid | *LOC107998471******** |

Note：*means DEGs show correlation with corresponding metabolites once in treatment vs. control groups, while **means twice.
